# Supplementary material for: Against the Odds: Hybrid Zones between Mangrove Killifish Species with Different Mating Systems
Source: MDPI journal article supplement (doi:10.3390/genes12101486), 2021-09-24
Supplement: s1 [file supplementary.pdf › genes-1363723 supplymentary/supplementary.pdf]

Supporting information for

**Against the odds: recent hybrid zones between mangrove killifish species with different mating systems**

Waldir M. Berbel-Filho<sup>1,2\*</sup>, Andrey Tatarenkov<sup>3</sup>, George Pacheco<sup>4</sup>, Helder M. V. Espírito-Santo<sup>5</sup>, Mateus G. Lira<sup>6</sup>, Carlos Garcia de Leaniz<sup>2</sup>, John C. Avise<sup>3</sup>, Sergio M. Q. Lima<sup>6</sup>, Carlos M. Rodríguez-López<sup>7</sup>, and Sofia Consuegra<sup>2\*</sup>

<sup>1</sup> Department of Biology, University of Oklahoma, Norman, OK, USA. (present address)

<sup>2</sup> Department of Biosciences, College of Science, Swansea University, Swansea, UK.

<sup>3</sup> Department of Ecology and Evolutionary Biology, University of California, Irvine, USA.

<sup>4</sup> Section for Evolutionary Genomics, The GLOBE Institute, Faculty of Health and Medical Sciences, University of Copenhagen, 1353 Copenhagen, Denmark.

<sup>5</sup> Núcleo de Ecologia Aquática e Pesca da Amazônia, Universidade Federal do Pará, Belém, Brazil.

<sup>6</sup> Laboratório de Ictiologia Sistemática e Evolutiva, Departamento de Botânica e Zoologia, Universidade Federal do Rio Grande, Natal, Brazil.

<sup>7</sup> Environmental Epigenetics and Genetics Group, Department of Horticulture, College of Agriculture, Food and Environment, University of Kentucky, Lexington, KY, USA.

\*Corresponding authors: [waldirmbf@gmail.com](mailto:waldirmbf@gmail.com); [s.consuegra@swansea.ac.uk](mailto:s.consuegra@swansea.ac.uk)

### Library preparation

200ng of genomic DNA were digested using a *EcoRI* (cutsite: GAATTC) and *HpaII* (cutsite: CCGG). Digested DNA was ligated to individually barcoded adapters with a *HpaII* cut site overhang and a common *EcoRI* Y adapter. Ligation products were individually cleaned to remove excess of adapters using Agencourt AMPure XP purification system (#A63880, Beckman Coulter, Brea, CA, USA) at a v/v ratio of 0.85 following the manufacturer's instructions. A single library was produced by pooling 20ng of DNA from each sample and amplified in eight separate PCR reactions (25  $\mu$ L each), containing 10  $\mu$ L of library DNA, 5  $\mu$ L of Q5 high fidelity buffer, 0.25  $\mu$ L of Q5 high fidelity polymerase, and 1  $\mu$ L of each Forward and Reverse common primer at 10  $\mu$ M, 0.5  $\mu$ L of 10  $\mu$ M dNTP and 7.25  $\mu$ L of pure sterile water. PCR products were pooled after amplification and size-selected (range 200 – 350 bp) using Agencourt AMPure XP magnetic beads. The size-selected library was sequenced in an Illumina NextSeq500 sequencer platform (Cardiff University Genomics Research Hub) to obtain 125bp paired-end reads.

### Data processing

Paired-end reads were processed using a combination of packages in the Linux bash shell environment. First, we used GBSX v 1.3 [1] to demultiplex the paired-end reads allowing for one mismatch in the barcodes (-mb 1), no mismatch in the enzyme cut-site (-me 0), and ensuring that no common sequencing adapter was removed (-ca false). We then filtered (-qtrim r; -minlength 25) and merged the reads by individual using BBmap tools [2] mapped to *Kryptolebias marmoratus* reference genome (assembly size = 680.3Mb; number of scaffolds = 3,073; N50 = 2,229,659; GC content = 37.76%; Rhee, et al. 2017) using Bowtie 2 v. 2.2.3 with default parameters [3] and generated filtered and indexed individual BAM files with SAMtools v. 1.9 [4].

48 To call genotypes, we used ANGSD v 0.9.2.9 [5] with the following parameters:  
49 minimum mapping quality (-minMapQ 30), minimum base quality (-minQ 20), only 5%  
50 of missing data to consider a site or SNP (-minInd 95%), maximum of 500 reads per  
51 position per individual (-setMaxDepth 500X per individual), minimum genotype  
52 posterior probability (-postCutoff 0.95). Single and double-tons (SNPs that only  
53 appeared in one or two individuals) were removed based on minimum minor allele  
54 frequencies (-MinMaf). Anomalous reads were filtered according to the flags (-  
55 remove\_bads 1; SAM flag above 255). Adjusted mapping quality for excessive  
56 mismatches was done using (-C 50). BAQ computation was performed (-baq 1), and the  
57 minimum coverage for genotype calling was 3 (-geno\_minDepth 3). We used SAMtools  
58 genotype likelihood model (-GL 1) and estimated posterior genotype probabilities  
59 assuming a uniform prior (-doPost 2). In addition, we used the ANGSD SNP calling  
60 method (-SNP\_pval 1e-6), where a Likelihood Ratio Test is used to compare between  
61 the null ( $\text{maf} = 0$ ) and alternative (estimated maf) hypotheses by using a  $X^2$  distribution  
62 with one degree of freedom.

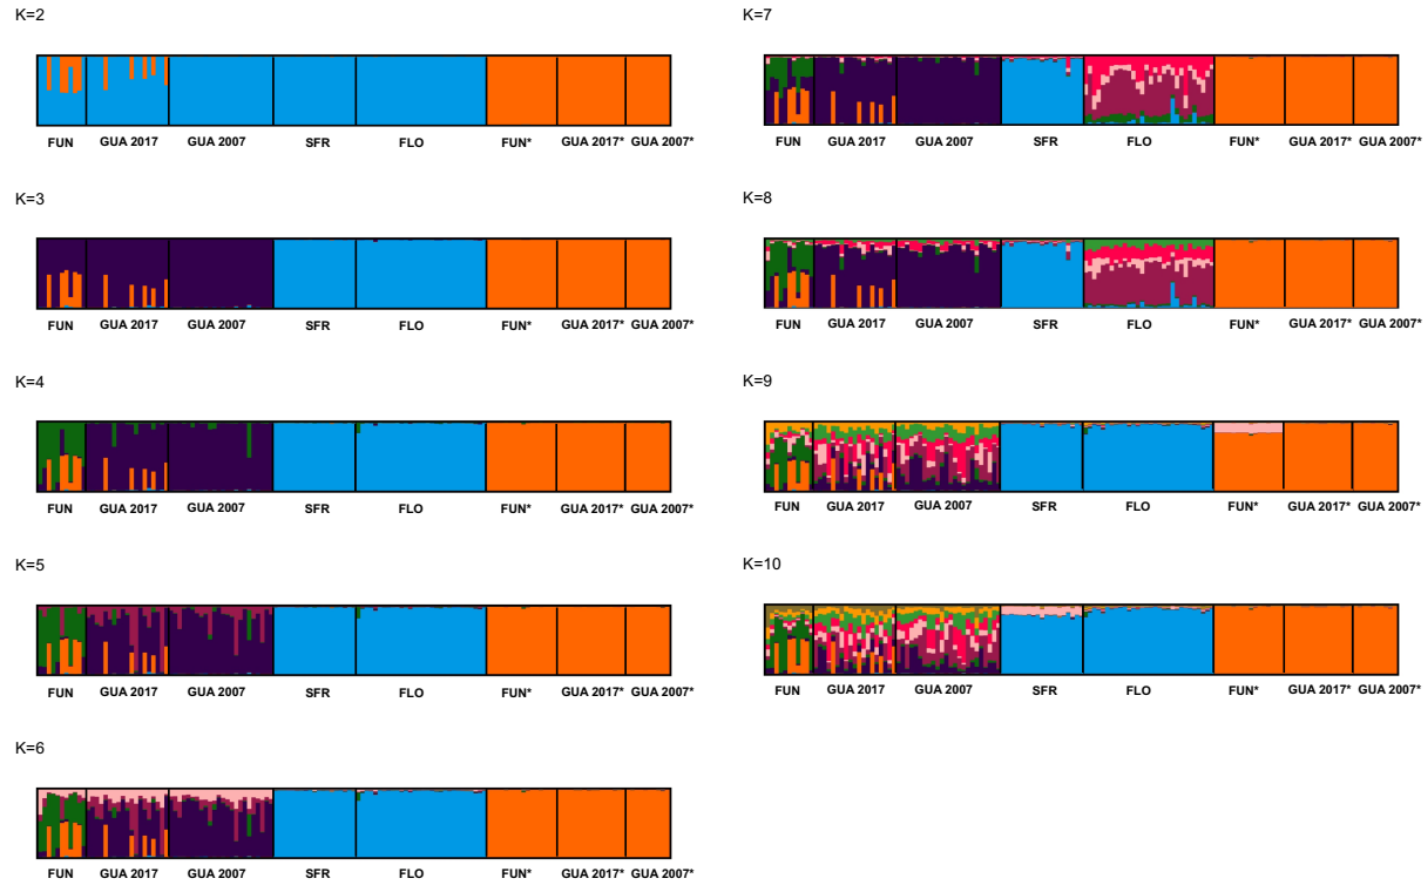

**Figure S1.** Individual ancestry plots with the highest likelihood runs for each K value ran in STRUCTION with genotypes for 16 microsatellites for 103 *K. ocellatus* and 42 *K. hermaphroditus* individuals. Asterisk denotes locations for individuals with *K. hermaphroditus* mtDNA.

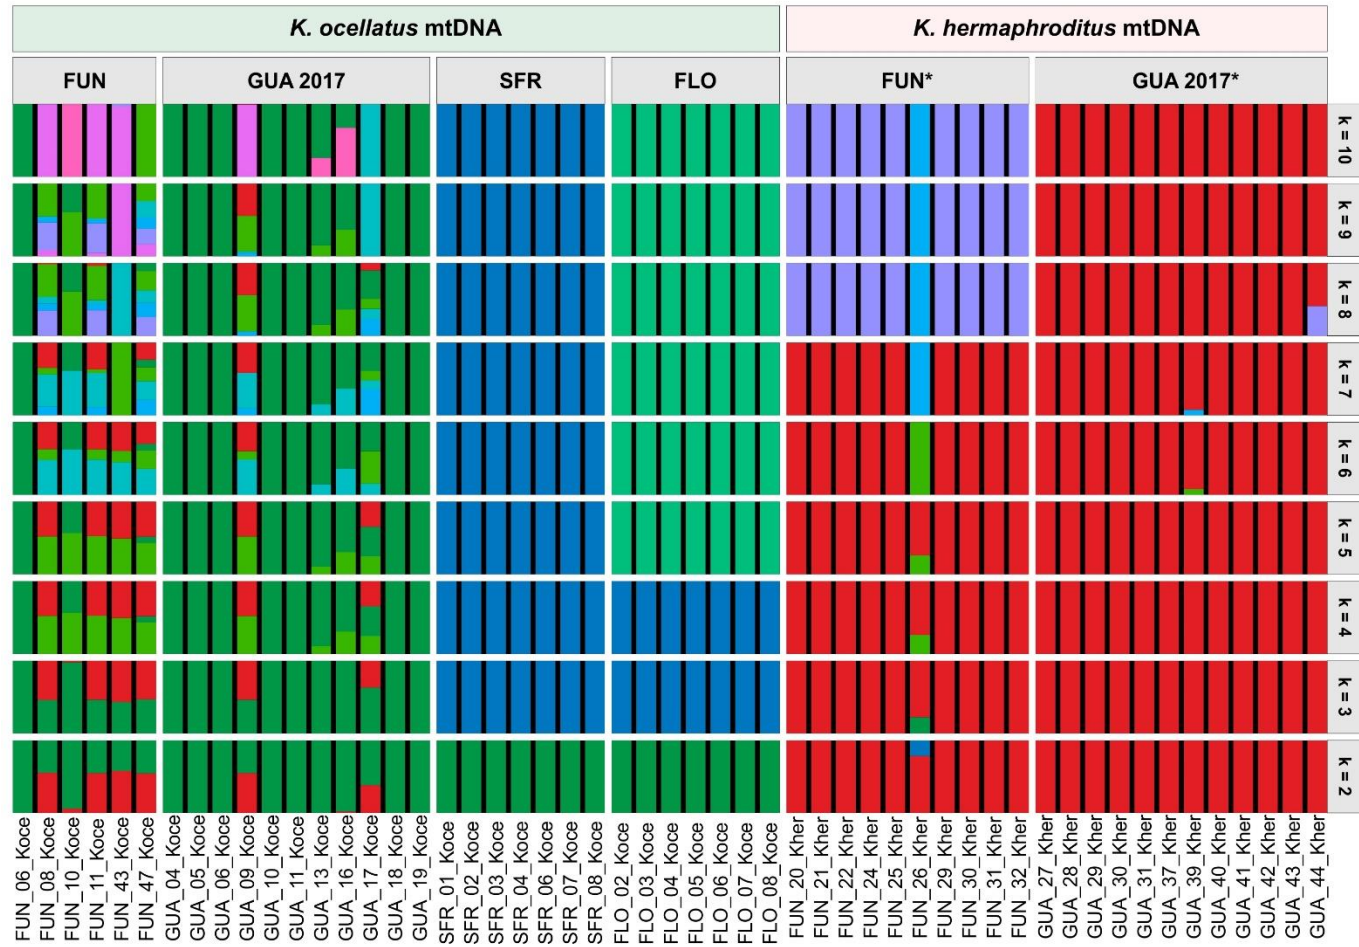

**Figure S2.** Individual ancestry plots with each K value ran in nsgAdmix with 5,477 SNPs from 31 *K. ocellatus* individuals and 22 *K. hermaphroditus* individuals. Asterisk denotes locations for individuals with *K. hermaphroditus* mtDNA.

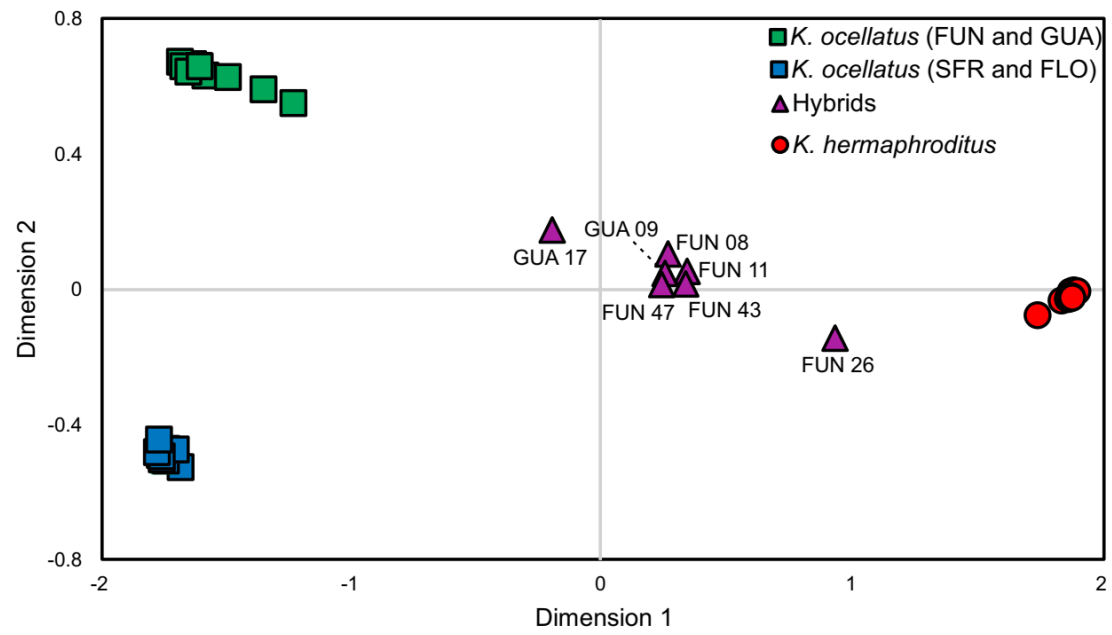

**Figure S3.** Multidimensional Scaling (MDS) based on the genetic distances from 5,477 SNPs. Hybrid individuals (see results) are highlighted with their respective labels.

**Supplementary Table S1.** Summary of 58 samples sequenced in the genotype-by-sequencing (msGBS) library. Individuals in red failed to pass the filtering cutoff ( $\geq 500$ kb reads). Superscript letters on ID denotes F1 and backcrosses. Parameters ‘proportion of heterozygous sites’ (for Dataset I), ‘coverage and missing data’ (for Dataset II) are described in Material and Methods.

| <b>ID</b> | <b>Species<br/>(identified using<br/><i>coxI</i>)</b> | <b>Sampling<br/>location</b> | <b>Number of<br/>reads</b> | <b>Uniquely<br/>mapped (%)</b> | <b>Coverage<br/>(X)</b> | <b>Missing<br/>data<br/>(%)</b> | <b>Proportion of<br/>Heterozygous<br/>sites</b> |
|-----------|-------------------------------------------------------|------------------------------|----------------------------|--------------------------------|-------------------------|---------------------------------|-------------------------------------------------|
| GUA_27    | <i>K. hermaphroditus</i>                              | GUA                          | 8,962,202                  | 90.30                          | 250.4                   | 0.00                            | 0.03                                            |
| GUA_28    | <i>K. hermaphroditus</i>                              | GUA                          | 4,161,657                  | 90.87                          | 114.9                   | 0.02                            | 0.03                                            |
| GUA_29    | <i>K. hermaphroditus</i>                              | GUA                          | 13,831,746                 | 90.29                          | 380.1                   | 0.00                            | 0.02                                            |
| GUA_30    | <i>K. hermaphroditus</i>                              | GUA                          | 7,000,238                  | 90.05                          | 190.2                   | 0.00                            | 0.02                                            |
| GUA_31    | <i>K. hermaphroditus</i>                              | GUA                          | 6,646,432                  | 89.95                          | 185.2                   | 0.02                            | 0.03                                            |
| GUA_37    | <i>K. hermaphroditus</i>                              | GUA                          | 3,013,973                  | 90.06                          | 82.2                    | 0.18                            | 0.03                                            |
| GUA_39    | <i>K. hermaphroditus</i>                              | GUA                          | 3,472,656                  | 89.73                          | 93.5                    | 0.02                            | 0.04                                            |
| GUA_40    | <i>K. hermaphroditus</i>                              | GUA                          | 13,651,662                 | 90.50                          | 382.6                   | 0.00                            | 0.03                                            |
| GUA_41    | <i>K. hermaphroditus</i>                              | GUA                          | 5,348,736                  | 90.08                          | 147.3                   | 0.04                            | 0.03                                            |
| GUA_42    | <i>K. hermaphroditus</i>                              | GUA                          | 1,786,528                  | 91.00                          | 48.8                    | 0.20                            | 0.02                                            |
| GUA_43    | <i>K. hermaphroditus</i>                              | GUA                          | 7,269,128                  | 89.39                          | 197.0                   | 0.00                            | 0.03                                            |
| GUA_44    | <i>K. hermaphroditus</i>                              | GUA                          | 7,937,202                  | 89.92                          | 216.6                   | 0.00                            | 0.02                                            |

|                      |                          |     |            |       |       |      |      |
|----------------------|--------------------------|-----|------------|-------|-------|------|------|
| FUN_20               | <i>K. hermaphroditus</i> | FUN | 8,493,250  | 89.83 | 229.9 | 0.00 | 0.02 |
| FUN_21               | <i>K. hermaphroditus</i> | FUN | 4,140,936  | 90.70 | 113.3 | 0.00 | 0.03 |
| FUN_22               | <i>K. hermaphroditus</i> | FUN | 4,990,777  | 90.96 | 138.7 | 0.00 | 0.03 |
| FUN_24               | <i>K. hermaphroditus</i> | FUN | 3,520,363  | 89.86 | 98.6  | 0.02 | 0.03 |
| FUN_25               | <i>K. hermaphroditus</i> | FUN | 4,421,739  | 90.34 | 120.7 | 0.04 | 0.03 |
| FUN_26 <sup>Ba</sup> | <i>K. hermaphroditus</i> | FUN | 1,361,947  | 69.56 | 24.9  | 0.84 | 0.32 |
| FUN_29               | <i>K. hermaphroditus</i> | FUN | 7,611,704  | 89.30 | 208.2 | 0.00 | 0.02 |
| FUN_30               | <i>K. hermaphroditus</i> | FUN | 2,892,977  | 88.63 | 77.2  | 0.00 | 0.03 |
| FUN_31               | <i>K. hermaphroditus</i> | FUN | 9,160,363  | 89.53 | 251.5 | 0.00 | 0.03 |
| FUN_32               | <i>K. hermaphroditus</i> | FUN | 2,322,888  | 88.84 | 62.4  | 0.02 | 0.02 |
| GUA_04               | <i>K. ocellatus</i>      | GUA | 5,033,372  | 77.40 | 102.4 | 0.15 | 0.08 |
| GUA_05               | <i>K. ocellatus</i>      | GUA | 11,979,935 | 75.68 | 235.1 | 0.00 | 0.08 |
| GUA_06               | <i>K. ocellatus</i>      | GUA | 6,418,126  | 81.00 | 143.5 | 0.04 | 0.08 |
| GUA_09 <sup>F1</sup> | <i>K. ocellatus</i>      | GUA | 5,784,849  | 84.54 | 138.1 | 0.05 | 0.61 |
| GUA_10               | <i>K. ocellatus</i>      | GUA | 11,097,202 | 81.18 | 243.2 | 0.04 | 0.08 |
| GUA_11               | <i>K. ocellatus</i>      | GUA | 2,208,760  | 75.05 | 44.5  | 0.46 | 0.06 |
| GUA_13               | <i>K. ocellatus</i>      | GUA | 11,446,137 | 77.19 | 230.1 | 0.00 | 0.09 |
| GUA_16               | <i>K. ocellatus</i>      | GUA | 14,282,577 | 80.18 | 313.2 | 0.00 | 0.11 |
| GUA_17 <sup>Ba</sup> | <i>K. ocellatus</i>      | GUA | 4,522,779  | 72.17 | 91.6  | 0.00 | 0.50 |



|                      |                     |     |            |       |       |      |      |
|----------------------|---------------------|-----|------------|-------|-------|------|------|
| GUA_18               | <i>K. ocellatus</i> | GUA | 7,266,866  | 79.34 | 149.5 | 0.05 | 0.08 |
| GUA_19               | <i>K. ocellatus</i> | GUA | 8,150,733  | 81.55 | 177.2 | 0.09 | 0.07 |
| GUA_20 <sup>Ba</sup> | <i>K. ocellatus</i> | GUA | 20,647     | NA    | NA    | NA   | NA   |
| GUA_24 <sup>Ba</sup> | <i>K. ocellatus</i> | GUA | 4,778      | NA    | NA    | NA   | NA   |
| GUA_62 <sup>F1</sup> | <i>K. ocellatus</i> | GUA | 300,213    | NA    | NA    | NA   | NA   |
| FUN_06               | <i>K. ocellatus</i> | FUN | 5,098,517  | 81.78 | 111.7 | 0.26 | 0.06 |
| FUN_08 <sup>F1</sup> | <i>K. ocellatus</i> | FUN | 9,433,950  | 86.75 | 234.2 | 0.00 | 0.60 |
| FUN_10               | <i>K. ocellatus</i> | FUN | 6,856,002  | 81.10 | 145.5 | 0.02 | 0.14 |
| FUN_11 <sup>F1</sup> | <i>K. ocellatus</i> | FUN | 7,773,860  | 86.68 | 199.0 | 0.00 | 0.62 |
| FUN_13 <sup>F1</sup> | <i>K. ocellatus</i> | FUN | 2,645      | NA    | NA    | NA   | NA   |
| FUN_41 <sup>Ba</sup> | <i>K. ocellatus</i> | FUN | 7,793      | NA    | NA    | NA   | NA   |
| FUN_43 <sup>F1</sup> | <i>K. ocellatus</i> | FUN | 578,575    | 83.31 | 13.8  | 4.14 | 0.48 |
| FUN_47 <sup>F1</sup> | <i>K. ocellatus</i> | FUN | 564,546    | 78.82 | 12.4  | 4.16 | 0.50 |
| FLO_02               | <i>K. ocellatus</i> | FLO | 13,605,858 | 81.73 | 301.5 | 0.04 | 0.05 |
| FLO_03               | <i>K. ocellatus</i> | FLO | 2,439,264  | 70.34 | 48.0  | 0.38 | 0.06 |
| FLO_04               | <i>K. ocellatus</i> | FLO | 2,167,505  | 79.99 | 46.8  | 0.40 | 0.06 |
| FLO_05               | <i>K. ocellatus</i> | FLO | 2,517,261  | 81.12 | 53.6  | 0.66 | 0.06 |
| FLO_06               | <i>K. ocellatus</i> | FLO | 4,609,454  | 78.83 | 96.2  | 0.11 | 0.06 |
| FLO_07               | <i>K. ocellatus</i> | FLO | 4,620,891  | 81.46 | 96.3  | 0.02 | 0.05 |

|         |                     |     |            |       |        |      |      |
|---------|---------------------|-----|------------|-------|--------|------|------|
| FLO_08  | <i>K. ocellatus</i> | FLO | 6,823,947  | 79.43 | 149.9  | 0.00 | 0.06 |
| SFR_01  | <i>K. ocellatus</i> | SFR | 9,375,699  | 81.74 | 209.4  | 0.05 | 0.06 |
| SFR_02  | <i>K. ocellatus</i> | SFR | 2,671,245  | 82.54 | 60.3   | 0.37 | 0.06 |
| SFR_03  | <i>K. ocellatus</i> | SFR | 8,014,672  | 81.64 | 177.9  | 0.11 | 0.06 |
| SFR_04  | <i>K. ocellatus</i> | SFR | 8,136,965  | 83.09 | 177.8  | 0.00 | 0.07 |
| SFR_06  | <i>K. ocellatus</i> | SFR | 10,875,988 | 82.37 | 240.8  | 0.15 | 0.05 |
| SFR_07  | <i>K. ocellatus</i> | SFR | 10,572775  | 82.07 | 235.7  | 0.05 | 0.06 |
| SFR_08  | <i>K. ocellatus</i> | SFR | 684,671    | 77.07 | 14.5   | 4.93 | 0.05 |
| Average |                     |     | 6,370,039  | 83.90 | 152.98 | 0.34 | 0.11 |

---

**Supplementary Table S2.** Descriptive statistics of genetic variation at microsatellite loci in (a) 103 *Kryptolebias ocellatus* and (b) 42 *K. hermaphroditus* individuals. N = sample size; P<sub>99</sub> = proportion of polymorphic loci (99% criterion); A = average number of alleles; H<sub>E</sub> = expected heterozygosity; H<sub>O</sub> = observed heterozygosity. Sampling locations are described in Table 1.

| Sampling location                                   | N           | P <sub>99</sub> | A           | H <sub>E</sub> | H <sub>O</sub> |
|-----------------------------------------------------|-------------|-----------------|-------------|----------------|----------------|
| (a) Individuals with <i>K. ocellatus</i> mtDNA      |             |                 |             |                |                |
| GUA 2007                                            | 24          | 0.93            | 8.19        | 0.60           | 0.53           |
| GUA 2017                                            | 19          | 1.00            | 9.31        | 0.65           | 0.64           |
| FUN 2017                                            | 11          | 0.93            | 6.56        | 0.66           | 0.70           |
| SFR                                                 | 19          | 0.87            | 7.25        | 0.57           | 0.63           |
| FLO                                                 | 30          | 0.81            | 9.88        | 0.54           | 0.52           |
| <b>Mean</b>                                         | <b>20.6</b> | <b>0.90</b>     | <b>3.83</b> | <b>0.60</b>    | <b>0.60</b>    |
| (b) Individuals with <i>K. hermaphroditus</i> mtDNA |             |                 |             |                |                |
| GUA 2007                                            | 10          | 0.21            | 1.57        | 0.10           | 0.00           |
| GUA 2017                                            | 16          | 0.13            | 1.73        | 0.09           | 0.01           |
| FUN 2017                                            | 16          | 0.13            | 1.33        | 0.03           | 0.00           |
| <b>Mean</b>                                         | <b>14</b>   | <b>0.15</b>     | <b>1.54</b> | <b>0.07</b>    | <b>0.003</b>   |

## References

1. Herten, K.; Hestand, M.S.; Vermeesch, J.R.; Van Houdt, J.K. GBSX: a toolkit for experimental design and demultiplexing genotyping by sequencing experiments. *BMC Bioinformatics* **2015**, *16*, 73, doi:10.1186/s12859-015-0514-3.
2. Bushnell, B. *BBMap: a fast, accurate, splice-aware aligner*; Lawrence Berkeley National Lab.(LBNL), Berkeley, CA (United States): 2014.
3. Langmead, B.; Salzberg, S.L. Fast gapped-read alignment with Bowtie 2. *Nat. Meth.* **2012**, *9*, 357.
4. Li, H.; Handsaker, B.; Wysoker, A.; Fennell, T.; Ruan, J.; Homer, N.; Marth, G.; Abecasis, G.; Durbin, R. The sequence alignment/map format and SAMtools. *Bioinformatics* **2009**, *25*, 2078-2079.
5. Korneliussen, T.S.; Albrechtsen, A.; Nielsen, R. ANGSD: analysis of next generation sequencing data. *BMC Bioinformatics* **2014**, *15*, 356, doi:10.1186/s12859-014-0356-4.
